# Supplementary material for: Biological noncovalent N/O⋯V interactions: insights from theory and protein data bank analyses
Source: Royal Society of Chemistry journal article supplement (doi:10.1039/d3cp04571d), 2023-01-01
Supplement: d3cp04571d1.pdf [file d3cp04571d1.pdf]

## Supporting Information

### **Biological Noncovalent N/O...V Interactions: Insights from Theory and Protein Data Bank Analyses.**

Sergi Burguera,<sup>[a]</sup> Antonio Frontera,<sup>[a]</sup> Antonio Bauzá\*<sup>[a]</sup>

<sup>[a]</sup>Departament de Química, Universitat de les Illes Balears Ctra. de Valldemossa km 7.5, 07122 Palma de Mallorca (Balears), Spain. E-mail: antonio.bauza@uib.es

|                                                            |        |
|------------------------------------------------------------|--------|
| <b>Cartesian coordinates of complexes 1 to 16</b>          | page 2 |
| <b>Cartesian coordinates of the H-optimized PDB models</b> | page 9 |

## Cartesian coordinates of complexes 1 to 16

### 1

|   |            |            |            |
|---|------------|------------|------------|
| V | 0.0002272  | -0.0010834 | 0.7721433  |
| O | 0.0013417  | -0.0014449 | 2.3286390  |
| O | -1.4470166 | -0.8353472 | 0.1986679  |
| O | 0.0002761  | 1.6702845  | 0.2014215  |
| O | 1.4465068  | -0.8363775 | 0.1975512  |
| H | 2.0827821  | -1.1967984 | 0.8208102  |
| H | -2.0836690 | -1.1968597 | 0.8208695  |
| H | -0.0000357 | 2.4010832  | 0.8252204  |
| O | -0.0004339 | 0.0011114  | -2.5213587 |
| C | 0.0000214  | -0.0045680 | -3.6439642 |

### 2

|   |            |            |            |
|---|------------|------------|------------|
| V | 0.0000594  | -0.0005542 | 0.7571683  |
| O | 0.0003715  | 0.0003039  | 2.3136122  |
| O | -1.4558324 | -0.8418059 | 0.2089414  |
| O | 0.0000612  | 1.6809616  | 0.2096274  |
| O | 1.4554504  | -0.8423332 | 0.2081692  |
| H | 2.0727742  | -1.1954858 | 0.8545432  |
| H | -2.0729062 | -1.1949334 | 0.8555779  |
| H | 0.0003290  | 2.3934983  | 0.8545941  |
| C | -0.0005412 | 0.0002974  | -2.5693976 |
| O | 0.0002342  | 0.0000511  | -3.6928362 |

### 3

|   |            |            |            |
|---|------------|------------|------------|
| V | -0.6095276 | -0.0378574 | -0.0692478 |
| O | -2.1570113 | 0.0530416  | 0.0941354  |
| O | -0.0844371 | -0.9693165 | 1.3701924  |
| O | -0.0827055 | 1.6757595  | -0.0731757 |
| O | -0.3773476 | -0.8777032 | -1.6105105 |
| H | -1.1677900 | -1.1428416 | -2.0898305 |
| H | -0.7763120 | -1.2657942 | 1.9674767  |
| H | -0.7750748 | 2.3389866  | -0.0084195 |
| O | 1.8844528  | -0.1008919 | -0.1787729 |
| H | 2.0749484  | 0.8367833  | -0.0741497 |
| H | 2.0708049  | -0.5101661 | 0.6723022  |

### 4

|   |           |           |           |
|---|-----------|-----------|-----------|
| V | 0.0261656 | 1.5463605 | 0.4469121 |
|---|-----------|-----------|-----------|

|   |            |            |            |
|---|------------|------------|------------|
| O | -0.0394437 | 3.0992257  | 0.5798606  |
| O | -0.4419523 | 1.2527784  | -1.2526139 |
| O | 1.7260774  | 1.1594572  | 0.8143544  |
| O | -1.1590245 | 0.9667935  | 1.6448632  |
| H | -1.6215330 | 1.6405650  | 2.1507542  |
| H | -0.6407864 | 2.0344894  | -1.7754049 |
| H | 2.3024547  | 1.9022706  | 1.0140173  |
| O | 0.1233189  | -0.9475022 | 0.1929794  |
| C | 1.1065605  | -1.4062444 | -0.7077649 |
| H | 0.8248262  | -1.1717999 | -1.7412462 |
| H | 2.0336711  | -0.8944902 | -0.4586208 |
| H | 1.2418853  | -2.4897321 | -0.6055400 |
| C | -1.1264648 | -1.5586493 | -0.0371322 |
| H | -1.8165232 | -1.1675986 | 0.7074644  |
| H | -1.4949991 | -1.3189716 | -1.0419284 |
| H | -1.0442328 | -2.6469518 | 0.0690458  |

## 5

|   |            |            |            |
|---|------------|------------|------------|
| V | 1.1943468  | -0.0809612 | 0.0035149  |
| O | 2.6646806  | 0.4349669  | -0.0105805 |
| O | 1.0437208  | -1.0416829 | 1.4876590  |
| O | 0.1829699  | 1.3891009  | 0.0088494  |
| O | 1.0156421  | -1.0472337 | -1.4739389 |
| H | 1.7817066  | -1.1352312 | -2.0486145 |
| H | 1.8191843  | -1.1221873 | 2.0508316  |
| H | 0.6428877  | 2.2332878  | 0.0028754  |
| C | -2.6517862 | 0.1890739  | -0.0074785 |
| H | -3.7412411 | 0.1730100  | -0.0212275 |
| H | -2.1645963 | 1.1635316  | -0.0174327 |
| S | -1.7875153 | -1.1556746 | 0.0255423  |

## 6

|   |            |            |            |
|---|------------|------------|------------|
| V | 0.0497247  | 1.7575516  | 0.0431191  |
| O | -0.0072373 | 3.2439747  | -0.4318938 |
| O | -0.3670167 | 0.8252208  | -1.4259524 |
| O | 1.7373991  | 1.5428377  | 0.5776255  |
| O | -1.1846787 | 1.6618160  | 1.3247439  |
| H | -1.6656209 | 2.4718546  | 1.5190906  |
| H | -0.5464253 | 1.3415402  | -2.2169611 |
| H | 2.3086610  | 2.3129743  | 0.5026955  |
| C | 1.3042372  | -1.6925854 | -0.2857785 |
| H | 1.0002079  | -1.3348362 | -1.2707123 |
| H | 2.2964113  | -1.3047741 | -0.0551917 |
| H | 1.3250941  | -2.7831235 | -0.2623688 |

|   |            |            |            |
|---|------------|------------|------------|
| C | -1.3690806 | -1.6669461 | 0.3391958  |
| H | -2.1493808 | -1.2709383 | 0.9891819  |
| H | -1.5308811 | -1.3036436 | -0.6765485 |
| H | -1.3940042 | -2.7574680 | 0.3668315  |
| S | 0.1925903  | -1.0434548 | 0.9629232  |

**7**

|   |            |            |            |
|---|------------|------------|------------|
| V | 0.0025463  | 1.7819198  | -0.0023683 |
| O | 0.4931230  | 3.2657337  | 0.0053244  |
| O | -0.9372471 | 1.7222302  | -1.5148934 |
| O | 1.6172296  | 0.9331368  | -0.0127366 |
| O | -0.9354705 | 1.7078451  | 1.5114552  |
| H | -0.9578878 | 2.5288683  | 2.0114343  |
| H | -0.9614440 | 2.5468516  | -2.0086743 |
| H | 2.3649609  | 1.5358902  | -0.0090941 |
| C | -0.2565604 | -1.5570514 | -0.0059562 |
| O | -0.7431269 | -0.4297418 | -0.0077645 |
| N | -1.0580814 | -2.6549752 | -0.1475546 |
| N | 1.0687563  | -1.7857589 | 0.1301937  |
| H | -0.7494881 | -3.5365662 | 0.2234862  |
| H | 1.6336376  | -0.9434904 | 0.0741843  |
| H | 1.4600138  | -2.6556731 | -0.1822963 |
| H | -2.0409613 | -2.4592187 | -0.0647397 |

**8**

|   |            |            |            |
|---|------------|------------|------------|
| V | -2.2532246 | -0.0155435 | -0.0000629 |
| O | -3.8178963 | -0.0716664 | -0.0007472 |
| O | -1.8374947 | -0.9020338 | 1.4979258  |
| O | -1.9473289 | 1.7532087  | -0.0001277 |
| O | -1.8365033 | -0.9024468 | -1.4975431 |
| H | -2.5891588 | -1.2368643 | -1.9935950 |
| H | -2.5904928 | -1.2364822 | 1.9934538  |
| H | -2.7368636 | 2.3008238  | -0.0004550 |
| C | 0.8471289  | -1.0869538 | 0.0002610  |
| C | 2.2283531  | -1.1773071 | -0.0000704 |
| C | 2.9691061  | -0.0059307 | -0.0001942 |
| C | 2.2983760  | 1.2054221  | 0.0000838  |
| C | 0.9124906  | 1.1978195  | 0.0004152  |
| N | 0.2013811  | 0.0754939  | 0.0004364  |
| H | 4.0527736  | -0.0375108 | -0.0005511 |
| H | 0.2226781  | -1.9729796 | 0.0004327  |
| H | 2.7084956  | -2.1479533 | -0.0003419 |
| H | 2.8340639  | 2.1465458  | -0.0000468 |
| H | 0.3341160  | 2.1143584  | 0.0007267  |

**9**

|    |            |            |            |
|----|------------|------------|------------|
| V  | -0.0000111 | -0.0001339 | -0.6872906 |
| O  | -0.0007929 | 0.0002688  | -2.3182548 |
| O  | 1.3155034  | 1.1786091  | -0.1518871 |
| O  | -1.1788165 | 1.3153203  | -0.1528403 |
| O  | 1.1793200  | -1.3153860 | -0.1535552 |
| O  | -1.3153192 | -1.1792479 | -0.1532566 |
| H  | -1.9104754 | 0.8928691  | 0.3053647  |
| H  | 0.8926943  | 1.9109867  | 0.3048173  |
| H  | 1.9104615  | -0.8926380 | 0.3052007  |
| H  | -0.8929287 | -1.9106963 | 0.3053121  |
| Na | -0.0003604 | 0.0003651  | -4.3474956 |
| O  | -0.0000699 | -0.0011699 | 2.8107583  |
| C  | 0.0007949  | 0.0008530  | 3.9331270  |

**10**

|    |            |            |            |
|----|------------|------------|------------|
| V  | -0.0000101 | -0.0000909 | -0.7281926 |
| O  | 0.0003498  | 0.0003381  | -2.3591724 |
| O  | 1.3214496  | 1.1735759  | -0.1961974 |
| O  | -1.1736495 | 1.3213044  | -0.1956326 |
| O  | 1.1738060  | -1.3215630 | -0.1968123 |
| O  | -1.3215531 | -1.1739636 | -0.1967240 |
| H  | -1.9022907 | 0.9008523  | 0.2691910  |
| H  | 0.9009060  | 1.9024347  | 0.2683397  |
| H  | 1.9018862  | -0.9011247 | 0.2689510  |
| H  | -0.9010123 | -1.9020820 | 0.2688321  |
| Na | -0.0004950 | 0.0004125  | -4.3883207 |
| C  | -0.0001276 | -0.0008233 | 3.0306865  |
| O  | 0.0007406  | 0.0007294  | 4.1550515  |

**11**

|    |            |            |            |
|----|------------|------------|------------|
| V  | 0.0000000  | 0.0000000  | -0.7957336 |
| O  | -0.0000000 | -0.0000000 | -2.4245256 |
| O  | -1.7566511 | 0.1161436  | -0.1762087 |
| O  | -0.0745841 | -1.7834398 | -0.3937010 |
| O  | 0.0745841  | 1.7834398  | -0.3937010 |
| O  | 1.7566511  | -0.1161436 | -0.1762087 |
| H  | 0.2890026  | -1.9173655 | 0.4877622  |
| H  | -2.0407426 | -0.7848002 | -0.0018727 |
| H  | -0.2890026 | 1.9173655  | 0.4877622  |
| H  | 2.0407426  | 0.7848002  | -0.0018727 |
| Na | -0.0000000 | -0.0000000 | -4.4493829 |
| O  | -0.0000000 | -0.0000000 | 2.2324632  |

|   |            |            |           |
|---|------------|------------|-----------|
| H | -0.7706165 | 0.0390136  | 2.8026097 |
| H | 0.7706165  | -0.0390136 | 2.8026097 |

## 12

|    |            |            |            |
|----|------------|------------|------------|
| V  | 0.0012407  | -0.0023236 | -1.7900973 |
| O  | 0.0018838  | -0.0049766 | -3.4177615 |
| O  | -1.7561343 | -0.0897848 | -1.1669859 |
| O  | 0.1331115  | -1.7834271 | -1.3945636 |
| O  | -0.1306161 | 1.7810114  | -1.4012761 |
| O  | 1.7576928  | 0.0887960  | -1.1657578 |
| H  | 0.5122712  | -1.8964057 | -0.5170577 |
| H  | -1.9373688 | -1.0195694 | -1.0047650 |
| H  | -0.5132245 | 1.8978770  | -0.5257961 |
| H  | 1.9370303  | 1.0195202  | -1.0068796 |
| Na | -0.0056480 | 0.0090775  | -5.4461833 |
| O  | 0.0000125  | -0.0000207 | 1.2817608  |
| C  | -1.1711629 | 0.0372567  | 2.0488876  |
| H  | -2.0030905 | 0.0855635  | 1.3463105  |
| H  | -1.2688969 | -0.8596707 | 2.6778563  |
| H  | -1.1940264 | 0.9201798  | 2.7045584  |
| C  | 1.1711402  | -0.0374273 | 2.0489608  |
| H  | 2.0030019  | -0.0851450 | 1.3462679  |
| H  | 1.2692050  | 0.8596828  | 2.6776336  |
| H  | 1.1935784  | -0.9202141 | 2.7048879  |

## 13

|    |            |            |            |
|----|------------|------------|------------|
| V  | 0.0001416  | -0.0000925 | -1.4511581 |
| O  | 0.0003436  | -0.0002657 | -3.0821066 |
| O  | 1.6775578  | -0.0415933 | -0.6657791 |
| O  | -0.0123930 | 1.8036949  | -1.1247126 |
| O  | 0.0125340  | -1.8037443 | -1.1243899 |
| O  | -1.6774522 | 0.0416463  | -0.6660359 |
| H  | -0.3956720 | 2.0134342  | -0.2669935 |
| H  | 1.9329589  | 0.8687488  | -0.4920316 |
| H  | 0.3953031  | -2.0136382 | -0.2664990 |
| H  | -1.9327885 | -0.8685839 | -0.4916233 |
| Na | -0.0009776 | 0.0005441  | -5.1124360 |
| C  | 0.0001294  | -0.0000567 | 3.7944440  |
| H  | -0.0490084 | -0.9208892 | 4.3771059  |
| H  | 0.0492297  | 0.9208133  | 4.3770291  |
| S  | 0.0000936  | -0.0000176 | 2.1951864  |

## 14

|   |           |            |            |
|---|-----------|------------|------------|
| V | 0.0006030 | -0.0011206 | -2.1634290 |
|---|-----------|------------|------------|

|    |            |            |            |
|----|------------|------------|------------|
| O  | 0.0017869  | -0.0019942 | -3.7928620 |
| O  | -1.7152211 | -0.0597543 | -1.4449863 |
| O  | 0.1096399  | -1.7916976 | -1.8037253 |
| O  | -0.1097941 | 1.7900993  | -1.8064086 |
| O  | 1.7158077  | 0.0584680  | -1.4439832 |
| H  | 0.4541364  | -1.9458146 | -0.9172022 |
| H  | -1.9127918 | -0.9866730 | -1.2846325 |
| H  | -0.4542705 | 1.9446106  | -0.9199225 |
| H  | 1.9135403  | 0.9856726  | -1.2855753 |
| Na | -0.0029256 | 0.0051840  | -5.8215075 |
| C  | -1.3769242 | 0.0036923  | 2.5034842  |
| H  | -2.2835356 | 0.0223104  | 1.8973399  |
| H  | -1.3813576 | -0.8947096 | 3.1248181  |
| H  | -1.3608285 | 0.8901652  | 3.1414784  |
| C  | 1.3768218  | -0.0030513 | 2.5030210  |
| H  | 2.2833280  | -0.0215209 | 1.8966692  |
| H  | 1.3813809  | 0.8953035  | 3.1243909  |
| H  | 1.3608412  | -0.8896584 | 3.1408106  |
| S  | -0.0002371 | 0.0004887  | 1.3522220  |

## 15

|    |            |            |            |
|----|------------|------------|------------|
| V  | 0.0020511  | 0.0000892  | -2.1966825 |
| O  | 0.0020807  | -0.0000219 | -3.8288391 |
| O  | 1.7622673  | 0.0434631  | -1.6117840 |
| O  | -0.0723482 | 1.7771003  | -1.7369006 |
| O  | 0.0749188  | -1.7769113 | -1.7391453 |
| O  | -1.7592330 | -0.0395487 | -1.6110459 |
| H  | -0.6772118 | 1.8641868  | -0.9933906 |
| H  | 1.9001032  | 0.9156062  | -1.2334061 |
| H  | 0.6692869  | -1.8655669 | -0.9874495 |
| H  | -1.9002865 | -0.9128675 | -1.2367094 |
| Na | -0.0034119 | -0.0008896 | -5.8500741 |
| O  | -0.0001151 | -0.0040097 | 1.1681625  |
| C  | 0.0001214  | -0.0018888 | 2.3790467  |
| N  | 1.1497683  | -0.1325565 | 3.1255688  |
| H  | 1.9888778  | -0.0380852 | 2.5777241  |
| H  | 1.1795153  | 0.2985823  | 4.0339095  |
| N  | -1.1489444 | 0.1316317  | 3.1258353  |
| H  | -1.9888302 | 0.0373939  | 2.5791957  |
| H  | -1.1786097 | -0.2957073 | 4.0359846  |

## 16

|   |           |            |            |
|---|-----------|------------|------------|
| V | 0.0023926 | -0.0017553 | -2.3159613 |
| O | 0.0031685 | -0.0047220 | -3.9425189 |

|    |            |            |            |
|----|------------|------------|------------|
| O  | -0.0652018 | 1.7874831  | -1.9339575 |
| O  | -1.7846967 | -0.0277806 | -1.7519115 |
| O  | 1.7881077  | 0.0302457  | -1.7518005 |
| O  | 0.0673984  | -1.7890375 | -1.9298376 |
| H  | -2.0024319 | -0.9524289 | -1.6060559 |
| H  | -0.4459889 | 1.9235324  | -1.0611396 |
| H  | 2.0012752  | 0.9556633  | -1.6040502 |
| H  | 0.4321116  | -1.9214876 | -1.0495330 |
| Na | -0.0029078 | 0.0068565  | -5.9689981 |
| C  | 1.1380781  | -0.0983024 | 1.3620163  |
| C  | 1.1897053  | -0.1014917 | 2.7487334  |
| C  | 0.0005634  | 0.0008418  | 3.4538521  |
| C  | -1.1885154 | 0.1016457  | 2.7483916  |
| C  | -1.1367631 | 0.0948335  | 1.3616977  |
| N  | 0.0006691  | -0.0028416 | 0.6831675  |
| H  | 0.0005250  | 0.0019299  | 4.5382824  |
| H  | 2.0327246  | -0.1777482 | 0.7498711  |
| H  | 2.1413622  | -0.1827517 | 3.2604630  |
| H  | -2.1401962 | 0.1840794  | 3.2599078  |
| H  | -2.0313800 | 0.1732362  | 0.7493814  |



## Cartesian coordinates of the H-optimized PDB models

### 2JJ9@SER236

|    |             |             |             |
|----|-------------|-------------|-------------|
| O  | 3.20859480  | 2.40747300  | -2.66605450 |
| C  | -3.81742340 | -0.25033730 | -5.86304000 |
| O  | -2.88376900 | -0.82756590 | -6.76580410 |
| C  | 1.25240670  | 2.36456350  | -6.29213060 |
| O  | 1.48717560  | 2.76295750  | -4.95645410 |
| V  | 0.34362410  | -1.81329760 | -4.83765800 |
| O  | 1.34204210  | -2.82514810 | -5.57722520 |
| O  | 0.55080250  | -0.27242090 | -5.45486180 |
| O  | -1.35596780 | -2.35469600 | -4.78788700 |
| P  | 1.86951830  | -1.72576640 | -1.95469430 |
| O  | 2.85271800  | -2.95563340 | -1.83142950 |
| O  | 2.65424440  | -0.24173090 | -1.99965600 |
| O  | 1.05325270  | -1.58246180 | -3.22995420 |
| P  | 0.87974870  | -0.35004830 | 0.48469540  |
| O  | -0.11493970 | 0.77959730  | -0.32107240 |
| O  | 2.22106180  | 0.18773280  | 1.00742320  |
| O  | 0.97018490  | -1.57437290 | -0.59921850 |
| O  | -0.13773630 | -1.01799510 | 1.54169790  |
| C  | -1.59727980 | -1.10992960 | 1.45009280  |
| C  | -2.19474410 | -0.82278960 | 2.79809210  |
| O  | -1.56476190 | -1.72667230 | 3.76554220  |
| C  | -1.83468670 | 0.55373930  | 3.38273110  |
| O  | -2.65408280 | 1.60643600  | 2.79892330  |
| C  | -2.10676810 | 0.32798620  | 4.88735790  |
| O  | -3.52797500 | 0.17199450  | 5.16742640  |
| C  | -1.45300220 | -1.07758800 | 5.07782900  |
| N  | -0.04713170 | -1.04940880 | 5.49948310  |
| C  | 1.09486440  | -1.51531330 | 4.80757380  |
| N  | 2.21339680  | -1.34787070 | 5.48239230  |
| C  | 1.82198030  | -0.74889810 | 6.68022010  |
| C  | 2.54077960  | -0.31871110 | 7.83798990  |
| N  | 3.88883110  | -0.45079630 | 7.96302510  |
| N  | 1.83855080  | 0.25119370  | 8.87925430  |
| C  | 0.48079210  | 0.39228480  | 8.78362530  |
| C  | 0.42024720  | -0.54952850 | 6.70702690  |
| N  | -0.29509780 | 0.01443110  | 7.73353910  |
| Mg | 1.84872610  | 0.95423900  | -3.71458030 |
| O  | 3.52353450  | 0.52177410  | -4.75784340 |
| O  | 0.05243820  | 2.25254840  | -2.27963950 |
| H  | -4.29681220 | -1.08901840 | -5.33617660 |

|   |             |             |             |
|---|-------------|-------------|-------------|
| H | -2.44741590 | -0.11361730 | -7.24375800 |
| H | 2.00337500  | 1.65443570  | -6.71839280 |
| H | 1.20200350  | 3.21899960  | -6.99867250 |
| H | -2.02489104 | -1.62062939 | -4.72441949 |
| H | -1.84151310 | -2.13096090 | 1.12110300  |
| H | -1.94859000 | -0.36852910 | 0.71492420  |
| H | -3.28897920 | -0.96374310 | 2.77964340  |
| H | -0.77658230 | 0.78694780  | 3.20636020  |
| H | -3.50458610 | 1.52190780  | 3.25179510  |
| H | -1.65251100 | 1.09107580  | 5.53604370  |
| H | -3.63727570 | 0.37056640  | 6.10313080  |
| H | -2.02503950 | -1.65638220 | 5.81904910  |
| H | 0.98856380  | -1.91503270 | 3.79908460  |
| H | 4.33884660  | -0.04837320 | 8.77183450  |
| H | -0.02332420 | 0.85365980  | 9.63802120  |
| H | 2.67518360  | 3.21147710  | -2.63147890 |
| H | 3.19016320  | 2.02336220  | -1.77179070 |
| H | 4.09809690  | 0.17456080  | -4.05301740 |
| H | 3.86848210  | 1.40707570  | -4.95708710 |
| H | 0.18454710  | 3.17768950  | -2.06335360 |
| H | 0.01621090  | 1.70922730  | -1.40537390 |
| H | 0.22135950  | 1.89065430  | -6.45495450 |
| H | -4.60886720 | 0.28715640  | -6.41484170 |
| H | 4.42808550  | -0.78093350 | 7.17645140  |
| H | -3.30720380 | 0.39814168  | -5.18182713 |
| H | 2.43285072  | 2.81018276  | -4.79812424 |
| H | -0.01983973 | 0.33997340  | -4.98481854 |

### 7B19@OH<sub>2</sub>

|   |             |             |             |
|---|-------------|-------------|-------------|
| C | 23.94800000 | 42.81100000 | 51.65600000 |
| O | 23.69800000 | 42.37300000 | 50.31600000 |
| H | 23.11400000 | 42.89400000 | 52.14300000 |
| C | 21.88400000 | 43.46500000 | 46.62100000 |
| O | 22.27800000 | 43.66500000 | 47.97300000 |
| H | 21.68600000 | 42.52400000 | 46.49400000 |
| H | 22.61700000 | 43.73100000 | 46.04400000 |
| V | 18.70600000 | 40.40100000 | 48.82900000 |
| O | 19.23300000 | 38.72300000 | 48.08600000 |
| O | 19.95900000 | 41.76000000 | 48.44800000 |
| O | 17.03000000 | 41.11200000 | 48.08400000 |
| P | 20.15900000 | 40.10900000 | 51.59500000 |
| O | 21.32600000 | 40.54700000 | 50.89200000 |
| O | 20.33200000 | 38.76100000 | 52.05300000 |

|    |             |             |             |
|----|-------------|-------------|-------------|
| O  | 18.75500000 | 40.12000000 | 50.83000000 |
| P  | 20.38000000 | 42.08600000 | 53.79800000 |
| O  | 21.71700000 | 41.70000000 | 54.14700000 |
| O  | 20.45500000 | 43.48100000 | 53.35800000 |
| O  | 19.67900000 | 41.12000000 | 52.74100000 |
| O  | 19.42200000 | 42.02700000 | 55.08300000 |
| C  | 18.23800000 | 42.71600000 | 54.95300000 |
| H  | 16.66900000 | 41.54700000 | 48.68900000 |
| H  | 18.32000000 | 43.36300000 | 54.23400000 |
| H  | 17.52100000 | 42.09400000 | 54.75500000 |
| Mg | 21.98300000 | 41.86500000 | 49.27100000 |
| O  | 22.99200000 | 40.29300000 | 48.30400000 |
| O  | 18.68200000 | 40.88000000 | 46.25000000 |
| O  | 21.13400000 | 43.51500000 | 50.26800000 |
| H  | 18.48671660 | 40.02842090 | 45.83871150 |
| H  | 17.81360570 | 41.25619480 | 46.46719460 |
| H  | 24.47990360 | 43.77704040 | 51.64921700 |
| H  | 24.57469160 | 42.07163280 | 52.17586460 |
| H  | 18.01652380 | 43.24572120 | 55.89244640 |
| H  | 20.98997350 | 44.06705240 | 46.41322270 |
| H  | 19.28795640 | 38.02419450 | 48.76326770 |
| H  | 21.42124990 | 44.38419150 | 49.97348430 |
| H  | 20.95339870 | 43.57264560 | 51.22882570 |
| H  | 24.05228680 | 39.99840670 | 48.81831120 |
| H  | 22.55750420 | 39.43646820 | 48.23467260 |
| H  | 24.57453810 | 42.05012610 | 49.92236440 |
| H  | 23.22372500 | 43.85577790 | 48.02097930 |

### 6MI8@SER139

|   |            |             |             |
|---|------------|-------------|-------------|
| C | 2.79780540 | 3.54332960  | 3.65967760  |
| C | 3.04580540 | 2.20232960  | 2.98667760  |
| O | 3.31480540 | 1.18732960  | 3.62867760  |
| N | 2.94880540 | 2.20232960  | 1.67167760  |
| C | 3.35780540 | 1.02732960  | 0.92867760  |
| C | 4.81880540 | 1.15532960  | 0.53367760  |
| O | 5.44280540 | 2.20532960  | 0.70567760  |
| C | 2.48980540 | 0.83932960  | -0.30132240 |
| O | 2.89680540 | -0.29567040 | -1.04432240 |
| N | 5.35680540 | 0.06432960  | -0.01632240 |
| C | 6.78580540 | -0.00367040 | -0.27332240 |
| P | 0.87480540 | -2.45867040 | -2.51932240 |
| O | 1.07280540 | -3.54967040 | -3.53832240 |
| O | 1.42080540 | -2.86567040 | -1.17732240 |

|   |             |             |             |
|---|-------------|-------------|-------------|
| O | 1.57680540  | -1.04267040 | -2.99632240 |
| P | -1.33019460 | -1.57567040 | -0.91932240 |
| O | -2.77619460 | -1.22167040 | -1.07032240 |
| O | -1.15719460 | -2.57067040 | 0.19167760  |
| O | -0.73719460 | -2.19867040 | -2.32232240 |
| O | -0.56919460 | -0.17467040 | -0.51632240 |
| C | -1.01719460 | 0.45032960  | 0.66567760  |
| C | -1.88519460 | 1.62632960  | 0.30467760  |
| O | -2.87319460 | 1.65532960  | 1.11467760  |
| C | -1.03919460 | 3.05332960  | 0.47667760  |
| O | -1.52819460 | 4.03032960  | -0.48132240 |
| C | -1.28019460 | 3.46032960  | 1.64667760  |
| O | -1.30019460 | 4.95832960  | 1.64467760  |
| C | -2.72319460 | 2.94432960  | 1.96567760  |
| N | -2.89019460 | 2.75732960  | 3.26767760  |
| C | -2.47919460 | 3.60232960  | 4.19767760  |
| N | -2.80219460 | 3.16132960  | 5.40167760  |
| C | -3.45019460 | 1.99932960  | 5.26367760  |
| C | -4.03019460 | 1.07432960  | 6.14167760  |
| N | -3.98319460 | 1.31532960  | 7.57867760  |
| N | -4.61919460 | -0.01467040 | 5.67567760  |
| C | -4.66319460 | -0.24067040 | 4.37167760  |
| N | -4.12619460 | 0.61632960  | 3.52167760  |
| C | -3.51019460 | 1.74332960  | 3.91267760  |
| V | 3.36580540  | -1.30167040 | -4.08032240 |
| O | 3.73480540  | -2.92867040 | -2.80432240 |
| O | 5.40980540  | -0.99067040 | -3.70032240 |
| O | 3.39180540  | 0.78532960  | -3.84632240 |
| O | 3.02880540  | -1.87767040 | -6.06932240 |
| H | 2.05795550  | 4.14918820  | 3.11438490  |
| H | 1.44423340  | 0.73906250  | 0.02826760  |
| H | 2.54870630  | 1.75313300  | -0.92843090 |
| H | 2.67347366  | -1.08983224 | -0.52561321 |
| H | 3.24807540  | 0.16436010  | 1.59991080  |
| H | 7.23138390  | 0.93932920  | 0.06424980  |
| H | 7.24149990  | -0.84479190 | 0.27349060  |
| H | -1.54832920 | -0.25492430 | 1.32569000  |
| H | -0.13734430 | 0.84006390  | 1.19797820  |
| H | -1.49488690 | 4.85234990  | 0.04563080  |
| H | -0.46931120 | 5.24521760  | 2.04793050  |
| H | -1.96202930 | 4.52845730  | 3.96448930  |
| H | -3.81974640 | 2.27884220  | 7.84147670  |
| H | -5.14832450 | -1.14481150 | 3.99259080  |
| H | 6.98136390  | -0.13099320 | -1.35046730 |

|   |             |             |             |
|---|-------------|-------------|-------------|
| H | 2.45611360  | 3.36448400  | 4.68616430  |
| H | 3.74444920  | 4.10457950  | 3.70010870  |
| H | 3.07562680  | 3.08302890  | 1.18561060  |
| H | 4.72726110  | -0.65786560 | -0.35198500 |
| H | -4.67640420 | 0.80054040  | 8.10642220  |
| H | 5.57411280  | -1.81058650 | -3.20789110 |
| H | 4.27009810  | 0.83358630  | -3.43032640 |
| H | 3.37759880  | -2.71608550 | -1.91846380 |
| H | -3.27142100 | -1.71033530 | -0.39044940 |
| H | 2.05340800  | -3.74631210 | -3.48719320 |
| N | -3.37419460 | -1.64867040 | -4.49232240 |
| C | -4.23619460 | -2.42567040 | -3.63132240 |
| C | -3.88419460 | -3.89167040 | -3.55232240 |
| O | -4.68519460 | -4.68767040 | -3.05932240 |
| N | -2.68619460 | -4.24867040 | -4.01732240 |
| C | -2.31519460 | -5.65367040 | -4.13632240 |
| H | -4.21307450 | -1.97651590 | -2.63105190 |
| H | -5.26745630 | -2.36994640 | -4.00600000 |
| H | -3.74324370 | -0.70809900 | -4.68291650 |
| H | -2.44118070 | -1.51060270 | -4.06211200 |
| H | -3.20973990 | -2.11835830 | -5.39460280 |
| H | -3.19594590 | -6.22584590 | -4.45187820 |
| H | -1.96391110 | -6.05946040 | -3.17506430 |
| H | -1.51542580 | -5.74668870 | -4.88156180 |
| H | -1.89588430 | -3.61400130 | -3.93260210 |
| H | -2.23786204 | 1.52748274  | -0.70068551 |
| H | -3.43384246 | 3.66863880  | 1.62618414  |

## 2JJ9@OH<sub>2</sub>

|   |             |             |              |
|---|-------------|-------------|--------------|
| C | 68.62900000 | 42.32000000 | -25.22900000 |
| O | 68.47400000 | 41.90500000 | -26.60000000 |
| C | 66.65500000 | 42.71600000 | -30.20700000 |
| O | 67.17900000 | 43.01600000 | -28.92900000 |
| V | 63.47400000 | 40.17300000 | -28.25500000 |
| O | 63.58300000 | 38.69200000 | -28.85700000 |
| O | 64.54100000 | 41.18200000 | -29.05600000 |
| O | 61.81000000 | 40.80900000 | -28.15100000 |
| P | 64.93000000 | 39.58800000 | -25.39400000 |
| O | 64.95400000 | 38.03400000 | -25.11300000 |
| O | 66.45600000 | 40.25300000 | -25.61600000 |
| O | 64.28700000 | 40.07600000 | -26.68300000 |
| P | 65.17200000 | 41.51900000 | -23.15000000 |
| O | 65.02900000 | 42.93300000 | -24.09600000 |

|    |             |             |              |
|----|-------------|-------------|--------------|
| O  | 66.59300000 | 41.16000000 | -22.68800000 |
| O  | 64.41300000 | 40.40000000 | -24.07400000 |
| O  | 64.03700000 | 41.73600000 | -22.02600000 |
| C  | 62.82800000 | 42.55900000 | -22.11600000 |
| Mg | 66.43796880 | 41.50947920 | -27.47102300 |
| O  | 67.41300000 | 40.03000000 | -28.44100000 |
| O  | 65.92800000 | 43.77800000 | -26.22000000 |
| O  | 63.24000000 | 40.20100000 | -30.74800000 |
| H  | 67.69131700 | 42.13044020 | -24.69317700 |
| H  | 69.35915130 | 41.74304260 | -27.01810970 |
| H  | 66.78081860 | 41.63591450 | -30.36160500 |
| H  | 67.22580110 | 43.23527200 | -30.99452250 |
| H  | 66.94378690 | 43.90771250 | -28.63768630 |
| H  | 63.98552190 | 37.91515550 | -28.41497950 |
| H  | 65.32520742 | 40.73398290 | -29.42730309 |
| H  | 61.99227890 | 41.93518310 | -22.46759800 |
| H  | 63.01143840 | 43.39088170 | -22.81047390 |
| H  | 63.30004240 | 39.28006910 | -31.03536100 |
| H  | 62.47001940 | 40.57393810 | -31.19855430 |
| H  | 68.40352380 | 39.99876510 | -28.24640360 |
| H  | 67.16772480 | 39.24227980 | -27.92600800 |
| H  | 66.83143380 | 43.98931070 | -25.95707670 |
| H  | 65.53680210 | 43.39918160 | -25.32359360 |
| H  | 68.90889200 | 43.38816660 | -25.17069370 |
| H  | 69.41261850 | 41.72367010 | -24.73906230 |
| H  | 65.59475950 | 43.00132640 | -30.30308670 |
| H  | 62.62831780 | 42.92222310 | -21.10029380 |

### 3MNQ@OH<sub>2</sub>

|   |             |             |             |
|---|-------------|-------------|-------------|
| C | 2.33015750  | 1.18562880  | 1.63232590  |
| O | 2.10815750  | 0.80362880  | 0.26632590  |
| C | 0.27715750  | 1.71162880  | -3.31367410 |
| O | 0.72515750  | 1.88262880  | -1.98267410 |
| V | -2.80384250 | -1.02837120 | -1.33967410 |
| O | -2.68384250 | -2.50037120 | -1.91367410 |
| O | -1.74784250 | 0.05362880  | -2.11567410 |
| O | -4.47584250 | -0.46137120 | -1.26467410 |
| P | -1.37184250 | -1.64037120 | 1.54532590  |
| O | 0.13015750  | -0.88937120 | 1.40132590  |
| O | -1.33084250 | -3.18037120 | 1.74032590  |
| O | -2.02084250 | -1.11637120 | 0.24532590  |
| P | -1.16684250 | 0.29762880  | 3.81832590  |
| O | 0.29315750  | -0.01637120 | 4.19632590  |
| O | -1.39884250 | 1.69762880  | 2.89132590  |

|    |             |             |             |
|----|-------------|-------------|-------------|
| O  | -1.92284250 | -0.85637120 | 2.89232590  |
| O  | -2.22784250 | 0.52262880  | 5.03332590  |
| C  | -3.53484250 | 1.20062880  | 4.98132590  |
| Mg | 0.10615750  | 0.28662880  | -0.52067410 |
| O  | 1.07415750  | -1.16137120 | -1.55167410 |
| O  | -0.35984250 | 2.02662880  | 0.39732590  |
| O  | -3.15684250 | -0.84337120 | -3.68467410 |
| H  | 1.43489550  | 0.95512140  | 2.22444940  |
| H  | 2.97522700  | 0.48355590  | -0.11761940 |
| H  | 0.39023530  | 0.66687650  | -3.65429680 |
| H  | 0.82994530  | 2.36367910  | -4.00887760 |
| H  | 1.69158680  | 1.82320490  | -1.93059240 |
| H  | -2.58061740 | -3.32636760 | -1.39938520 |
| H  | -0.90505448 | -0.30500301 | -2.43321541 |
| H  | -4.30809640 | 0.47915250  | 4.67782020  |
| H  | -3.47524960 | 2.03538480  | 4.26802940  |
| H  | 0.70988790  | -2.05429470 | -1.58027080 |
| H  | -0.70944880 | 1.93090350  | 1.36007500  |
| H  | -3.97742140 | -0.35848010 | -3.86004220 |
| H  | -3.27890760 | -1.71160550 | -4.09446840 |
| H  | 0.37035710  | 2.65168040  | 0.42803150  |
| H  | 2.00968570  | -1.35005560 | -1.17507230 |
| H  | 2.57804060  | 2.26002460  | 1.70009990  |
| H  | 3.16352370  | 0.60269560  | 2.04883490  |
| H  | -0.77803410 | 2.01257230  | -3.34248710 |
| H  | -3.72485500 | 1.55829720  | 6.00032890  |

### 3MJX@OH<sub>2</sub>

|   |             |             |             |
|---|-------------|-------------|-------------|
| C | 24.10800000 | 42.05900000 | 51.49500000 |
| O | 23.78900000 | 41.59700000 | 50.17300000 |
| C | 22.17100000 | 42.55900000 | 46.53000000 |
| O | 22.50500000 | 42.66600000 | 47.90600000 |
| V | 18.97900000 | 39.86700000 | 48.53600000 |
| O | 19.09900000 | 38.36500000 | 48.00400000 |
| O | 20.01600000 | 40.91800000 | 47.67500000 |
| O | 17.30400000 | 40.42700000 | 48.58000000 |
| P | 20.40600000 | 39.33200000 | 51.43300000 |
| O | 21.91400000 | 40.09100000 | 51.29300000 |
| O | 20.44900000 | 37.78300000 | 51.67800000 |
| O | 19.75900000 | 39.82900000 | 50.11400000 |
| P | 20.56100000 | 41.31900000 | 53.67000000 |
| O | 22.00700000 | 41.01300000 | 54.11300000 |
| O | 20.34800000 | 42.70200000 | 52.70100000 |
| O | 19.82600000 | 40.13800000 | 52.75200000 |

|    |             |             |             |
|----|-------------|-------------|-------------|
| O  | 19.46300000 | 41.57200000 | 54.84400000 |
| C  | 18.22900000 | 42.35700000 | 54.76000000 |
| Mg | 21.75100000 | 41.16500000 | 49.37800000 |
| O  | 22.91900000 | 39.73900000 | 48.42500000 |
| O  | 21.43400000 | 43.02600000 | 50.38600000 |
| O  | 18.57800000 | 39.86700000 | 46.12300000 |
| H  | 23.28870220 | 41.78884350 | 52.17585390 |
| H  | 24.63379070 | 41.40376150 | 49.68668450 |
| H  | 22.37580030 | 41.51878270 | 46.24136440 |
| H  | 22.81095570 | 43.21303530 | 45.91606110 |
| H  | 22.25767130 | 43.53126130 | 48.25780760 |
| H  | 19.25203680 | 37.57481830 | 48.56260700 |
| H  | 20.63608586 | 40.49564776 | 47.05714268 |
| H  | 17.40142430 | 41.70268980 | 54.44629100 |
| H  | 18.37220150 | 43.17625020 | 54.04123150 |
| H  | 23.84289710 | 39.52763390 | 48.84435800 |
| H  | 20.96382070 | 42.89729500 | 51.32941100 |
| H  | 18.48127160 | 38.95567870 | 45.81508490 |
| H  | 17.75024460 | 40.31084930 | 45.88956870 |
| H  | 22.62224270 | 38.85467550 | 48.18655960 |
| H  | 22.34003030 | 43.22134210 | 50.65829820 |
| H  | 18.04543570 | 42.73983150 | 55.77146870 |
| H  | 24.28449690 | 43.15281080 | 51.50529430 |
| H  | 21.11440060 | 42.80968710 | 46.33310990 |
| H  | 25.02188250 | 41.56580950 | 51.85779310 |
